# Supplementary material for: Birth Weight and Birth Weight for Gestational Age in Relation to Risk of Hospitalization with Primary Hypertension in Children and Young Adults
Source: Springer Nature journal article supplement (doi:10.1007/s10995-016-1939-7), 2016-03-15
Supplement: MOESM1 [file 8937214]

**Article title**:

Birth weight and Birth weight for Gestational Age in Relation to Risk of Hospitalization with Primary Hypertension in Children and Young Adults.

**Journal Name:**

Maternal and Child Health Journal

**Author Names:**

Gaia Pocobelli, Sascha Dublin, Daniel A. Enquobahrie,and Beth A. Mueller

**Corresponding Author:**

Gaia Pocobelli, PhD, Department of Epidemiology, University of Washington, 1959 NE Pacific Street, Health Sciences Building F-262, Box 357236, Seattle, WA, 98195-7236. Tel: 206-819-4006; Fax: 206-543-8525; Email: gpocobel@uw.edu

**Online Resource 1**. ICD-9 codes used to ascertain case and control groups and maternal covariates

| Condition | ICD-9 code |
| --- | --- |
| Case definition |  |
| Primary (essential) hypertension | 401.x |
| Excluded from case and control groups |  |
| Secondary hypertensiona |  |
| Hypertensive heart disease | 402.x |
| Hypertensive chronic kidney disease | 403.x |
| Hypertensive heart and chronic kidney disease | 404.x |
| Secondary hypertension | 405.x |
| Primary pulmonary hypertension | 416.0 |
| Chronic venous hypertension | 459.3x |
| Pregnancy-associated hypertension |  |
| Hypertension complicating pregnancy, childbirth, and the puerperium | 642.x |
| Causes of secondary hypertension (diagnosed at birth)1 |  |
| Congenital anomaly | 740.x-759.x |
| Diseases of the genitourinary system | 580.x-594.x |
| Endocrine, nutritional or metabolic disease or immunity disorder | 240.x-246.x, 252.x, 253.x, 255.x, 256.4 |
| Polycythemia | 776.4 |
| Chronic respiratory disease arising in the perinatal period | 770.7 |
| Diseases of the circulatory system | 444.x, 446.x, 447.x, 453.3 |
| Musculoskeletal system or connective tissue disease | 710.x, 720.x |
| Nervous system or sense organ disease | 325.x, 326.x, 372.2, 324.0, 324.9, 348.2 |
| Neoplasm | 189.x, 191.x, 193.x, 194.x, 223.x, 225.x-227x, 237x |
| Maternal covariates |  |
| Established/chronic diabetes | 250.x, 362.0x, 648.01, 648.02 |
| Gestational diabetes | 648.8 |
| Chronic hypertensionb | 401.x, 405.x, 416.0, 459.3x, 642.0x, 642.1x, 642.2x, 642.7x |
| Preeclampsia or eclampsiab | 642.4x, 642.5x, 642.6x |
| Gestational hypertensionb | 642.3x, 642.9x |

aModified from Yoon et al. ([Yoon et al., 2012](#_ENREF_31))

bModified from Savitz et al. ([Savitz et al., 2014](#_ENREF_25))
